# Supplementary material
Source: PubMed Central journal article supplement (PMC3692317)
Supplement: hdy201318x4.pdf [file hdy201318x4.pdf]

## Supplementary Material

List of the Carnivora MHC DQB and DRB exon 2 sequences used for the tests of trans-species polymorphism

| Family | GenBank Accession number | Species                         | Allele        |
|--------|--------------------------|---------------------------------|---------------|
| Canids | AM076472.1               | <i>Canis familiaris</i>         | Cafa-DRB-203  |
|        | DQ528655.1               | <i>Canis familiaris</i>         | Cafa-DQB-5401 |
|        | AY009508.1               | <i>Canis lupus baileyi</i>      | Calu-DRB-1    |
|        | AY009509.1               | <i>Canis lupus baileyi</i>      | Calu-DRB-2    |
|        | AY009514.1               | <i>Canis lupus baileyi</i>      | Calu-DRB-3    |
|        | AY009526.1               | <i>Canis lupus baileyi</i>      | Calu-DRB-4    |
|        | AY009522.1               | <i>Canis lupus baileyi</i>      | Calu-DRB-5    |
|        | AY009521.1               | <i>Canis lupus</i>              | Calu-DRB-5    |
|        | AY009510.1               | <i>Canis lupus</i>              | Calu-DRB-6    |
|        | AY009519.1               | <i>Canis lupus</i>              | Calu-DRB-7    |
|        | AY009513.1               | <i>Canis lupus</i>              | Calu-DRB-8    |
|        | AY009517.1               | <i>Canis lupus</i>              | Calu-DRB-9    |
|        | AY009518.1               | <i>Canis lupus</i>              | Calu-DRB-10   |
|        | AY009511.1               | <i>Canis lupus</i>              | Calu-DRB-11   |
|        | AY009512.1               | <i>Canis rufus</i>              | Caru-DRB-1    |
|        | AY009516.1               | <i>Canis rufus</i>              | Caru-DRB-2    |
|        | AY009515.1               | <i>Canis rufus</i>              | Caru-DRB-3    |
|        | AY009529.1               | <i>Canis latrans</i>            | Cala-DRB-8    |
|        | AY009523.1               | <i>Canis latrans</i>            | Cala-DRB-7    |
|        | AY009528.1               | <i>Canis latrans</i>            | Cala-DRB-6    |
|        | AY009527.1               | <i>Canis latrans</i>            | Cala-DRB-5    |
|        | AY009525.1               | <i>Canis latrans</i>            | Cala-DRB-4    |
|        | AY009524.1               | <i>Canis latrans</i>            | Cala-DRB-3    |
|        | AY009520.1               | <i>Canis latrans</i>            | Cala-DRB-2    |
|        | AY009530.1               | <i>Canis latrans</i>            | Cala-DRB-1    |
|        | EF690694.1               | <i>Vulpes lagopus</i>           | Vula-DRB-1    |
| Felids | FJ210683.1               | <i>Neofelis nebulosa</i>        | Nene-DRB-201  |
|        | FJ210688.1               | <i>Neofelis nebulosa</i>        | Nene-DRB-202  |
|        | FJ210684.1               | <i>Uncia uncia</i>              | Paun-DRB-201  |
|        | FJ210685.1               | <i>Prionailurus bengalensis</i> | Prbe-DRB-201  |
|        | FJ210686.1               | <i>Prionailurus bengalensis</i> | Prbe-DRB-202  |
|        | FJ210687.1               | <i>Prionailurus bengalensis</i> | Prbe-DRB-203  |
|        | FJ210703.1               | <i>Prionailurus bengalensis</i> | Prbe-DRB-101  |
|        | FJ210718.1               | <i>Prionailurus bengalensis</i> | Prbe-DRB-401  |
|        | FJ210706.1               | <i>Prionailurus bengalensis</i> | Prbe-DRB-501  |
|        | FJ210689.1               | <i>Panthera tigris</i>          | Pati-DRB-201  |
|        | FJ210690.1               | <i>Panthera tigris</i>          | Pati-DRB-202  |
|        | FJ210691.1               | <i>Panthera tigris</i>          | Pati-DRB-203  |
|        | FJ210692.1               | <i>Panthera tigris</i>          | Pati-DRB-204  |

|        |            |                               |              |
|--------|------------|-------------------------------|--------------|
|        | FJ210693.1 | <i>Panthera tigris</i>        | Pati-DRB-205 |
|        | FJ210696.1 | <i>Panthera tigris</i>        | Pati-DRB-206 |
|        | FJ210699.1 | <i>Panthera tigris</i>        | Pati-DRB-207 |
|        | FJ210709.1 | <i>Panthera tigris</i>        | Pati-DRB-301 |
|        | FJ210712.1 | <i>Panthera tigris</i>        | Pati-DRB-302 |
|        | FJ210713.1 | <i>Panthera tigris</i>        | Pati-DRB-303 |
|        | FJ210714.1 | <i>Panthera tigris</i>        | Pati-DRB-304 |
|        | FJ210716.1 | <i>Panthera tigris</i>        | Pati-DRB-305 |
|        | FJ210717.1 | <i>Panthera tigris</i>        | Pati-DRB-306 |
|        | FJ210694.1 | <i>Catopuma temminckii</i>    | Pate-DRB-201 |
|        | FJ210704.1 | <i>Catopuma temminckii</i>    | Pate-DRB-501 |
|        | FJ210705.1 | <i>Catopuma temminckii</i>    | Pate-DRB-502 |
|        | FJ210697.1 | <i>Panthera leo</i>           | Pale-DRB-201 |
|        | FJ210698.1 | <i>Panthera leo</i>           | Pale-DRB-202 |
|        | FJ210701.1 | <i>Felis silvestris</i>       | Fesi-DRB-101 |
|        | FJ210702.1 | <i>Felis silvestris bieti</i> | Febi-DRB-101 |
|        | FJ210707.1 | <i>Felis silvestris bieti</i> | Febi-DRB-502 |
|        | FJ210708.1 | <i>Felis silvestris bieti</i> | Febi-DRB-503 |
|        | FJ210700.1 | <i>Panthera pardus</i>        | Papa-DRB-201 |
|        | FJ210710.1 | <i>Panthera pardus</i>        | Papa-DRB-301 |
|        | FJ210711.1 | <i>Panthera pardus</i>        | Papa-DRB-302 |
|        | FJ210695.1 | <i>Otocolobus manul</i>       | Otma-DRB-201 |
|        | FJ210715.1 | <i>Otocolobus manul</i>       | Otma-DRB-301 |
| Ursids | AF458914.1 | <i>Ursus maritimus</i>        | Urma-DRB-01  |
|        | AF458915.1 | <i>Ursus maritimus</i>        | Urma-DRB-02  |
|        | AF458916.1 | <i>Ursus maritimus</i>        | Urma-DRB-03  |
|        | AF458917.1 | <i>Ursus maritimus</i>        | Urma-DRB-04  |
|        | AF458918.1 | <i>Ursus maritimus</i>        | Urma-DRB-05  |
|        | AF458919.1 | <i>Ursus maritimus</i>        | Urma-DRB-06  |
|        | AF458920.1 | <i>Ursus maritimus</i>        | Urma-DRB-07  |
|        | AF458921.1 | <i>Ursus maritimus</i>        | Urma-DRB-08  |
|        | AF458922.1 | <i>Ursus maritimus</i>        | Urma-DRB-09  |
|        | AF458923.1 | <i>Ursus maritimus</i>        | Urma-DRB-10  |
|        | AF458924.1 | <i>Ursus maritimus</i>        | Urma-DRB-11  |
|        | AF458925.1 | <i>Ursus maritimus</i>        | Urma-DRB-12  |
|        | AF458926.1 | <i>Ursus maritimus</i>        | Urma-DRB-13  |
|        | AF458927.1 | <i>Ursus maritimus</i>        | Urma-DRB-14  |
|        | AF458928.1 | <i>Ursus maritimus</i>        | Urma-DRB-15  |
|        | AF458929.1 | <i>Ursus maritimus</i>        | Urma-DRB-16  |
|        | AF458930.1 | <i>Ursus maritimus</i>        | Urma-DRB-17  |
|        | AF458931.1 | <i>Ursus maritimus</i>        | Urma-DRB-18  |
|        | AF458932.1 | <i>Ursus maritimus</i>        | Urma-DRB-19  |
|        | AF458933.1 | <i>Ursus maritimus</i>        | Urma-DRB-20  |
|        | AF458934.1 | <i>Ursus maritimus</i>        | Urma-DRB-21  |
|        | AF458935.1 | <i>Ursus maritimus</i>        | Urma-DRB-22  |

|            |            |                               |               |
|------------|------------|-------------------------------|---------------|
|            | AF458936.1 | <i>Ursus maritimus</i>        | Urma-DRB-23   |
|            | AF458937.1 | <i>Ursus maritimus</i>        | Urma-DRB-24   |
|            | AF458938.1 | <i>Ursus maritimus</i>        | Urma-DRB-25   |
|            | AB490476.1 | <i>Ursus maritimus</i>        | Urma-DRB-gd01 |
|            | AB490477.1 | <i>Ursus maritimus</i>        | Urma-DRB-gd02 |
|            | AB490485.1 | <i>Melursus ursinus</i>       | Urur-DRB-01   |
|            | AB490486.1 | <i>Melursus ursinus</i>       | Urur-DRB-02   |
|            | AB490487.1 | <i>Melursus ursinus</i>       | Urur-DRB-03   |
|            | AB490488.1 | <i>Melursus ursinus</i>       | Urur-DRB-04   |
|            | AB490489.1 | <i>Tremarctos ornatus</i>     | Tror-DRB-01   |
|            | AB490490.1 | <i>Tremarctos ornatus</i>     | Tror-DRB-02   |
|            | AB490479.1 | <i>Ursus thibetanus</i>       | Urth-DRB-02   |
|            | AB490480.1 | <i>Ursus americanus</i>       | Uram-DRB-01   |
|            | AB490481.1 | <i>Ursus americanus</i>       | Uram-DRB-02   |
|            | AB490482.1 | <i>Ursus americanus</i>       | Uram-DRB-03   |
|            | AB490483.1 | <i>Helarctos malayanus</i>    | Urml-DRB-01   |
|            | AB490484.1 | <i>Helarctos malayanus</i>    | Urml-DRB-02   |
|            | AB490478.1 | <i>Ursus thibetanus</i>       | Urth-DRB-01   |
|            | AB490457.1 | <i>Ursus arctos</i>           | Urar-DRB-01   |
|            | AB490458.1 | <i>Ursus arctos</i>           | Urar-DRB-02   |
|            | AB490459.1 | <i>Ursus arctos</i>           | Urar-DRB-03   |
|            | AB490460.1 | <i>Ursus arctos</i>           | Urar-DRB-04   |
|            | AB490461.1 | <i>Ursus arctos</i>           | Urar-DRB-05   |
|            | AB490462.1 | <i>Ursus arctos</i>           | Urar-DRB-06   |
|            | AB490463.1 | <i>Ursus arctos</i>           | Urar-DRB-07   |
|            | AB490464.1 | <i>Ursus arctos</i>           | Urar-DRB-08   |
|            | AB490465.1 | <i>Ursus arctos</i>           | Urar-DRB-09   |
|            | AB490466.1 | <i>Ursus arctos</i>           | Urar-DRB-10   |
|            | AB490467.1 | <i>Ursus arctos</i>           | Urar-DRB-11   |
|            | AB490468.1 | <i>Ursus arctos</i>           | Urar-DRB-12   |
|            | AB490469.1 | <i>Ursus arctos</i>           | Urar-DRB-13   |
|            | AB490470.1 | <i>Ursus arctos</i>           | Urar-DRB-14   |
|            | AB490471.1 | <i>Ursus arctos</i>           | Urar-DRB-15   |
|            | AB490472.1 | <i>Ursus arctos</i>           | Urar-DRB-16   |
|            | AB490473.1 | <i>Ursus arctos</i>           | Urar-DRB-17   |
|            | AB490474.1 | <i>Ursus arctos</i>           | Urar-DRB-18   |
|            | AB490475.1 | <i>Ursus arctos</i>           | Urar-DRB-19   |
|            | GQ496169.1 | <i>Ailuropoda melanoleuca</i> | Aime-DRB3-05  |
|            | GQ496167.1 | <i>Ailuropoda melanoleuca</i> | Aime-DRB3-03  |
|            | AY895158.1 | <i>Ailuropoda melanoleuca</i> | Aime-DRB-4    |
|            | AY895156.1 | <i>Ailuropoda melanoleuca</i> | Aime-DRB-2    |
| Mustelid   | HQ908092.1 | <i>Meles_meles</i>            | Meme-DRB-01   |
|            | HQ908093.1 | <i>Meles_meles</i>            | Meme-DRB-02   |
|            | HQ908094.1 | <i>Meles_meles</i>            | Meme-DRB-03   |
| Procyonids | HM589210.1 | <i>Procyon lotor</i>          | Prlo-DRB-44   |

|            |               |             |
|------------|---------------|-------------|
| GU388312.1 | Procyon lotor | Prlo-DRB-01 |
| GU388314.1 | Procyon lotor | Prlo-DRB-03 |
| GU388315.1 | Procyon lotor | Prlo-DRB-04 |
| GU388316.1 | Procyon lotor | Prlo-DRB-05 |
| GU388317.1 | Procyon lotor | Prlo-DRB-06 |
| GU388318.1 | Procyon lotor | Prlo-DRB-07 |
| GU388319.1 | Procyon lotor | Prlo-DRB-08 |
| GU388320.1 | Procyon lotor | Prlo-DRB-09 |
| GU388321.1 | Procyon lotor | Prlo-DRB-10 |
| GU388322.1 | Procyon lotor | Prlo-DRB-11 |
| GU388323.1 | Procyon lotor | Prlo-DRB-12 |
| GU388324.1 | Procyon lotor | Prlo-DRB-13 |
| GU388325.1 | Procyon lotor | Prlo-DRB-14 |
| GU388326.1 | Procyon lotor | Prlo-DRB-15 |
| GU388327.1 | Procyon lotor | Prlo-DRB-16 |
| GU388370.1 | Procyon lotor | Prlo-DRB-17 |
| GU388328.1 | Procyon lotor | Prlo-DRB-18 |
| GU388329.1 | Procyon lotor | Prlo-DRB-19 |
| GU388330.1 | Procyon lotor | Prlo-DRB-20 |
| GU388331.1 | Procyon lotor | Prlo-DRB-21 |
| GU388332.1 | Procyon lotor | Prlo-DRB-22 |
| GU388333.1 | Procyon lotor | Prlo-DRB-24 |
| GU388334.1 | Procyon lotor | Prlo-DRB-25 |
| GU388335.1 | Procyon lotor | Prlo-DRB-26 |
| GU388336.1 | Procyon lotor | Prlo-DRB-27 |
| GU388337.1 | Procyon lotor | Prlo-DRB-28 |
| GU388338.1 | Procyon lotor | Prlo-DRB-29 |
| GU388339.1 | Procyon lotor | Prlo-DRB-30 |
| GU388340.1 | Procyon lotor | Prlo-DRB-31 |
| GU388371.1 | Procyon lotor | Prlo-DRB-32 |
| GU388341.1 | Procyon lotor | Prlo-DRB-34 |
| GU388342.1 | Procyon lotor | Prlo-DRB-42 |
| GU388343.1 | Procyon lotor | Prlo-DRB-43 |
| GU388344.1 | Procyon lotor | Prlo-DRB-47 |
| GU388372.1 | Procyon lotor | Prlo-DRB-48 |
| GU388345.1 | Procyon lotor | Prlo-DRB-49 |
| GU388346.1 | Procyon lotor | Prlo-DRB-50 |
| GU388348.1 | Procyon lotor | Prlo-DRB-52 |
| GU388349.1 | Procyon lotor | Prlo-DRB-53 |
| GU388350.1 | Procyon lotor | Prlo-DRB-54 |
| GU388351.1 | Procyon lotor | Prlo-DRB-55 |
| GU388352.1 | Procyon lotor | Prlo-DRB-56 |
| GU388353.1 | Procyon lotor | Prlo-DRB-57 |
| GU388373.1 | Procyon lotor | Prlo-DRB-58 |
| GU388374.1 | Procyon lotor | Prlo-DRB-59 |

|           |            |                             |                    |
|-----------|------------|-----------------------------|--------------------|
|           | GU388354.1 | Procyon lotor               | Prlo-DRB-62        |
|           | GU388375.1 | Procyon lotor               | Prlo-DRB-64        |
|           | GU388355.1 | Procyon lotor               | Prlo-DRB-68        |
|           | GU388356.1 | Procyon lotor               | Prlo-DRB-69        |
|           | GU388357.1 | Procyon lotor               | Prlo-DRB-70        |
|           | GU388358.1 | Procyon lotor               | Prlo-DRB-71        |
|           | GU388376.1 | Procyon lotor               | Prlo-DRB-73        |
|           | GU388360.1 | Procyon lotor               | Prlo-DRB-74        |
|           | GU388359.1 | Procyon lotor               | Prlo-DRB-75        |
|           | GU388361.1 | Procyon lotor               | Prlo-DRB-76        |
|           | GU388362.1 | Procyon lotor               | Prlo-DRB-78        |
|           | GU388377.1 | Procyon lotor               | Prlo-DRB-80        |
|           | GU388363.1 | Procyon lotor               | Prlo-DRB-81        |
|           | GU388364.1 | Procyon lotor               | Prlo-DRB-85        |
|           | GU388365.1 | Procyon lotor               | Prlo-DRB-90        |
|           | GU388366.1 | Procyon lotor               | Prlo-DRB-99        |
|           | GU388367.1 | Procyon lotor               | Prlo-DRB-100       |
|           | GU388368.1 | Procyon lotor               | Prlo-DRB-102       |
|           | GU388369.1 | Procyon lotor               | Prlo-DRB-103       |
| Pinnipeds | DQ354689.1 | Phocarcos hookeri           | Phho93-32-DRB-0402 |
|           | AY491456.1 | Zalophus californianus      | Zaca-DRB-01        |
|           | AY491457.1 | Zalophus californianus      | Zaca-DRB-02        |
|           | AY491458.1 | Zalophus californianus      | Zaca-DRB-03        |
|           | AY491459.1 | Zalophus californianus      | Zaca-DRB-04        |
|           | AY491460.1 | Zalophus californianus      | Zaca-DRB-05        |
|           | AY491461.1 | Zalophus californianus      | Zaca-DRB-06        |
|           | AY491462.1 | Zalophus californianus      | Zaca-DRB-07        |
|           | AY491463.1 | Zalophus californianus      | Zaca-DRB-08        |
|           | AY491464.1 | Zalophus californianus      | Zaca-DRB-09        |
|           | AY491465.1 | Zalophus californianus      | Zaca-DRB-10        |
|           | AY491466.1 | Zalophus californianus      | Zaca-DRB-11        |
|           | AY491467.1 | Zalophus californianus      | Zaca-DRB-12        |
|           | HE663130.1 | Arctocephalus galapagoensis | Arga_DRB_FM_FS_K3  |
|           | HE663131.1 | Arctocephalus galapagoensis | Arga_DRB_FM_FS_K4  |
|           | HE663129.1 | Arctocephalus galapagoensis | Arga_DRB_FM6_FS_K4 |
|           | HE663126.1 | Zalophus wollebaeki         | Zawo-DQB-01        |
|           | HE663127.1 | Zalophus wollebaeki         | Zawo-DQB-02        |
|           | HE663128.1 | Zalophus wollebaeki         | Zawo-DQB-03        |
|           | HE663098.1 | Zalophus wollebaeki         | Zawo-DRB-01        |
|           | HE663099.1 | Zalophus wollebaeki         | Zawo-DRB-02        |
|           | HE663100.1 | Zalophus wollebaeki         | Zawo-DRB-03        |
|           | HE663101.1 | Zalophus wollebaeki         | Zawo-DRB-04        |
|           | HE663102.1 | Zalophus wollebaeki         | Zawo-DRB-05        |
|           | HE663103.1 | Zalophus wollebaeki         | Zawo-DRB-06        |
|           | HE663104.1 | Zalophus wollebaeki         | Zawo-DRB-07        |

|            |                         |               |
|------------|-------------------------|---------------|
| HE663105.1 | Zalophus wollebaeki     | Zawo-DRB-08   |
| HE663106.1 | Zalophus wollebaeki     | Zawo-DRB-09   |
| HE663107.1 | Zalophus wollebaeki     | Zawo-DRB-10   |
| HE663108.1 | Zalophus wollebaeki     | Zawo-DRB-11   |
| HE663109.1 | Zalophus wollebaeki     | Zawo-DRB-12   |
| HE663110.1 | Zalophus wollebaeki     | Zawo-DRB-13   |
| HE663111.1 | Zalophus wollebaeki     | Zawo-DRB-14   |
| HE663112.1 | Zalophus wollebaeki     | Zawo-DRB-15   |
| HE663114.1 | Zalophus wollebaeki     | Zawo-DRB-16   |
| HE663113.1 | Zalophus wollebaeki     | Zawo-DRB-17   |
| HE663115.1 | Zalophus wollebaeki     | Zawo-DRB-18   |
| HE663116.1 | Zalophus wollebaeki     | Zawo-DRB-19   |
| HE663117.1 | Zalophus wollebaeki     | Zawo-DRB-20   |
| HE663118.1 | Zalophus wollebaeki     | Zawo-DRB-21   |
| HE663119.1 | Zalophus wollebaeki     | Zawo-DRB-22   |
| HE663120.1 | Zalophus wollebaeki     | Zawo-DRB-23   |
| HE663121.1 | Zalophus wollebaeki     | Zawo-DRB-24   |
| HE663122.1 | Zalophus wollebaeki     | Zawo-DRB-25   |
| HE663123.1 | Zalophus wollebaeki     | Zawo-DRB-26   |
| HE663124.1 | Zalophus wollebaeki     | Zawo-DRB-27   |
| HE663125.1 | Zalophus wollebaeki     | Zawo-DXB-01   |
| HQ456122.1 | Halichoerus grypus      | Hagr-DQB-01   |
| HQ456123.1 | Halichoerus grypus      | Hagr-DQB-02   |
| HQ456124.1 | Halichoerus grypus      | Hagr-DQB-03   |
| HQ456125.1 | Halichoerus grypus      | Hagr-DQB-04   |
| HQ456126.1 | Halichoerus grypus      | Hagr-DQB-05   |
| AY007204.1 | Monachus schauinslandi  | Mosc-DQB-HMS2 |
| AY007203.1 | Monachus schauinslandi  | Mosc-DQB-HMS1 |
| AF111030.1 | Mirounga angustirostris | Mian-DQB-NES1 |
| AF111031.1 | Mirounga angustirostris | Mian-DQB-NES2 |
| AF111032.1 | Mirounga leonine        | Mile-DQB-SES1 |
| AF111033.1 | Mirounga leonine        | Mile-DQB-SES3 |
| AF111034.1 | Mirounga leonine        | Mile-DQB-SES4 |
| AF111035.1 | Mirounga leonine        | Mile-DQB-SES5 |
| AF111036.1 | Mirounga leonine        | Mile-DQB-SES6 |
| AF111037.1 | Mirounga leonina        | Mile-DQB-SES7 |
| AF111038.1 | Mirounga leonina        | Mile-DQB-SES8 |
| KC544970   | Phocarctos hookeri      | Phho_1        |
| KC544971   | Phocarctos hookeri      | Phho_2        |
| KC544972   | Phocarctos hookeri      | Phho_3        |
| KC544973   | Phocarctos hookeri      | Phho_4        |
| KC544974   | Phocarctos hookeri      | Phho_5        |
| KC544975   | Phocarctos hookeri      | Phho_6        |
| KC544976   | Phocarctos hookeri      | Phho_7        |
| KC544977   | Phocarctos hookeri      | Phho_8        |

|           |                         |                    |               |
|-----------|-------------------------|--------------------|---------------|
|           | KC544978                | Phocarctos hookeri | Phho_9        |
|           | KC544979                | Phocarctos hookeri | Phho_10       |
|           | KC544980                | Phocarctos hookeri | Phho_11       |
|           | KC544981                | Phocarctos hookeri | Phho_12       |
|           | KC544982                | Phocarctos hookeri | Phho_13       |
|           | KC544983                | Phocarctos hookeri | Phho_14       |
|           | KC544984                | Phocarctos hookeri | Phho_15       |
|           | KC544985                | Phocarctos hookeri | Phho_16       |
|           | KC544986                | Phocarctos hookeri | Phho_17       |
|           | KC544987                | Phocarctos hookeri | Phho_18       |
|           | KC544988                | Phocarctos hookeri | Phho_19       |
|           | KC544989                | Phocarctos hookeri | Phho_20       |
|           | KC544990                | Phocarctos hookeri | Phho_21       |
|           | KC544991                | Phocarctos hookeri | Phho_22       |
|           | KC544992                | Phocarctos hookeri | Phho_23       |
|           | KC544993                | Phocarctos hookeri | Phho_24       |
|           | KC544994                | Phocarctos hookeri | Phho_25       |
|           | KC544995                | Phocarctos hookeri | Phho_26       |
|           | KC544996                | Phocarctos hookeri | Phho_27       |
|           | KC544997                | Phocarctos hookeri | Phho_28       |
|           | doi:10.5061/dryad.2kt7s | Phocarctos hookeri | Phho_DQB_1    |
|           | doi:10.5061/dryad.2kt7s | Phocarctos hookeri | Phho_DQB_2    |
| Ungulates | NM_001113695.1          | Sus scrofa         | Susc-SLA-DRB1 |
