# Supplementary material
Source: PubMed Central journal article supplement (PMC3692317)

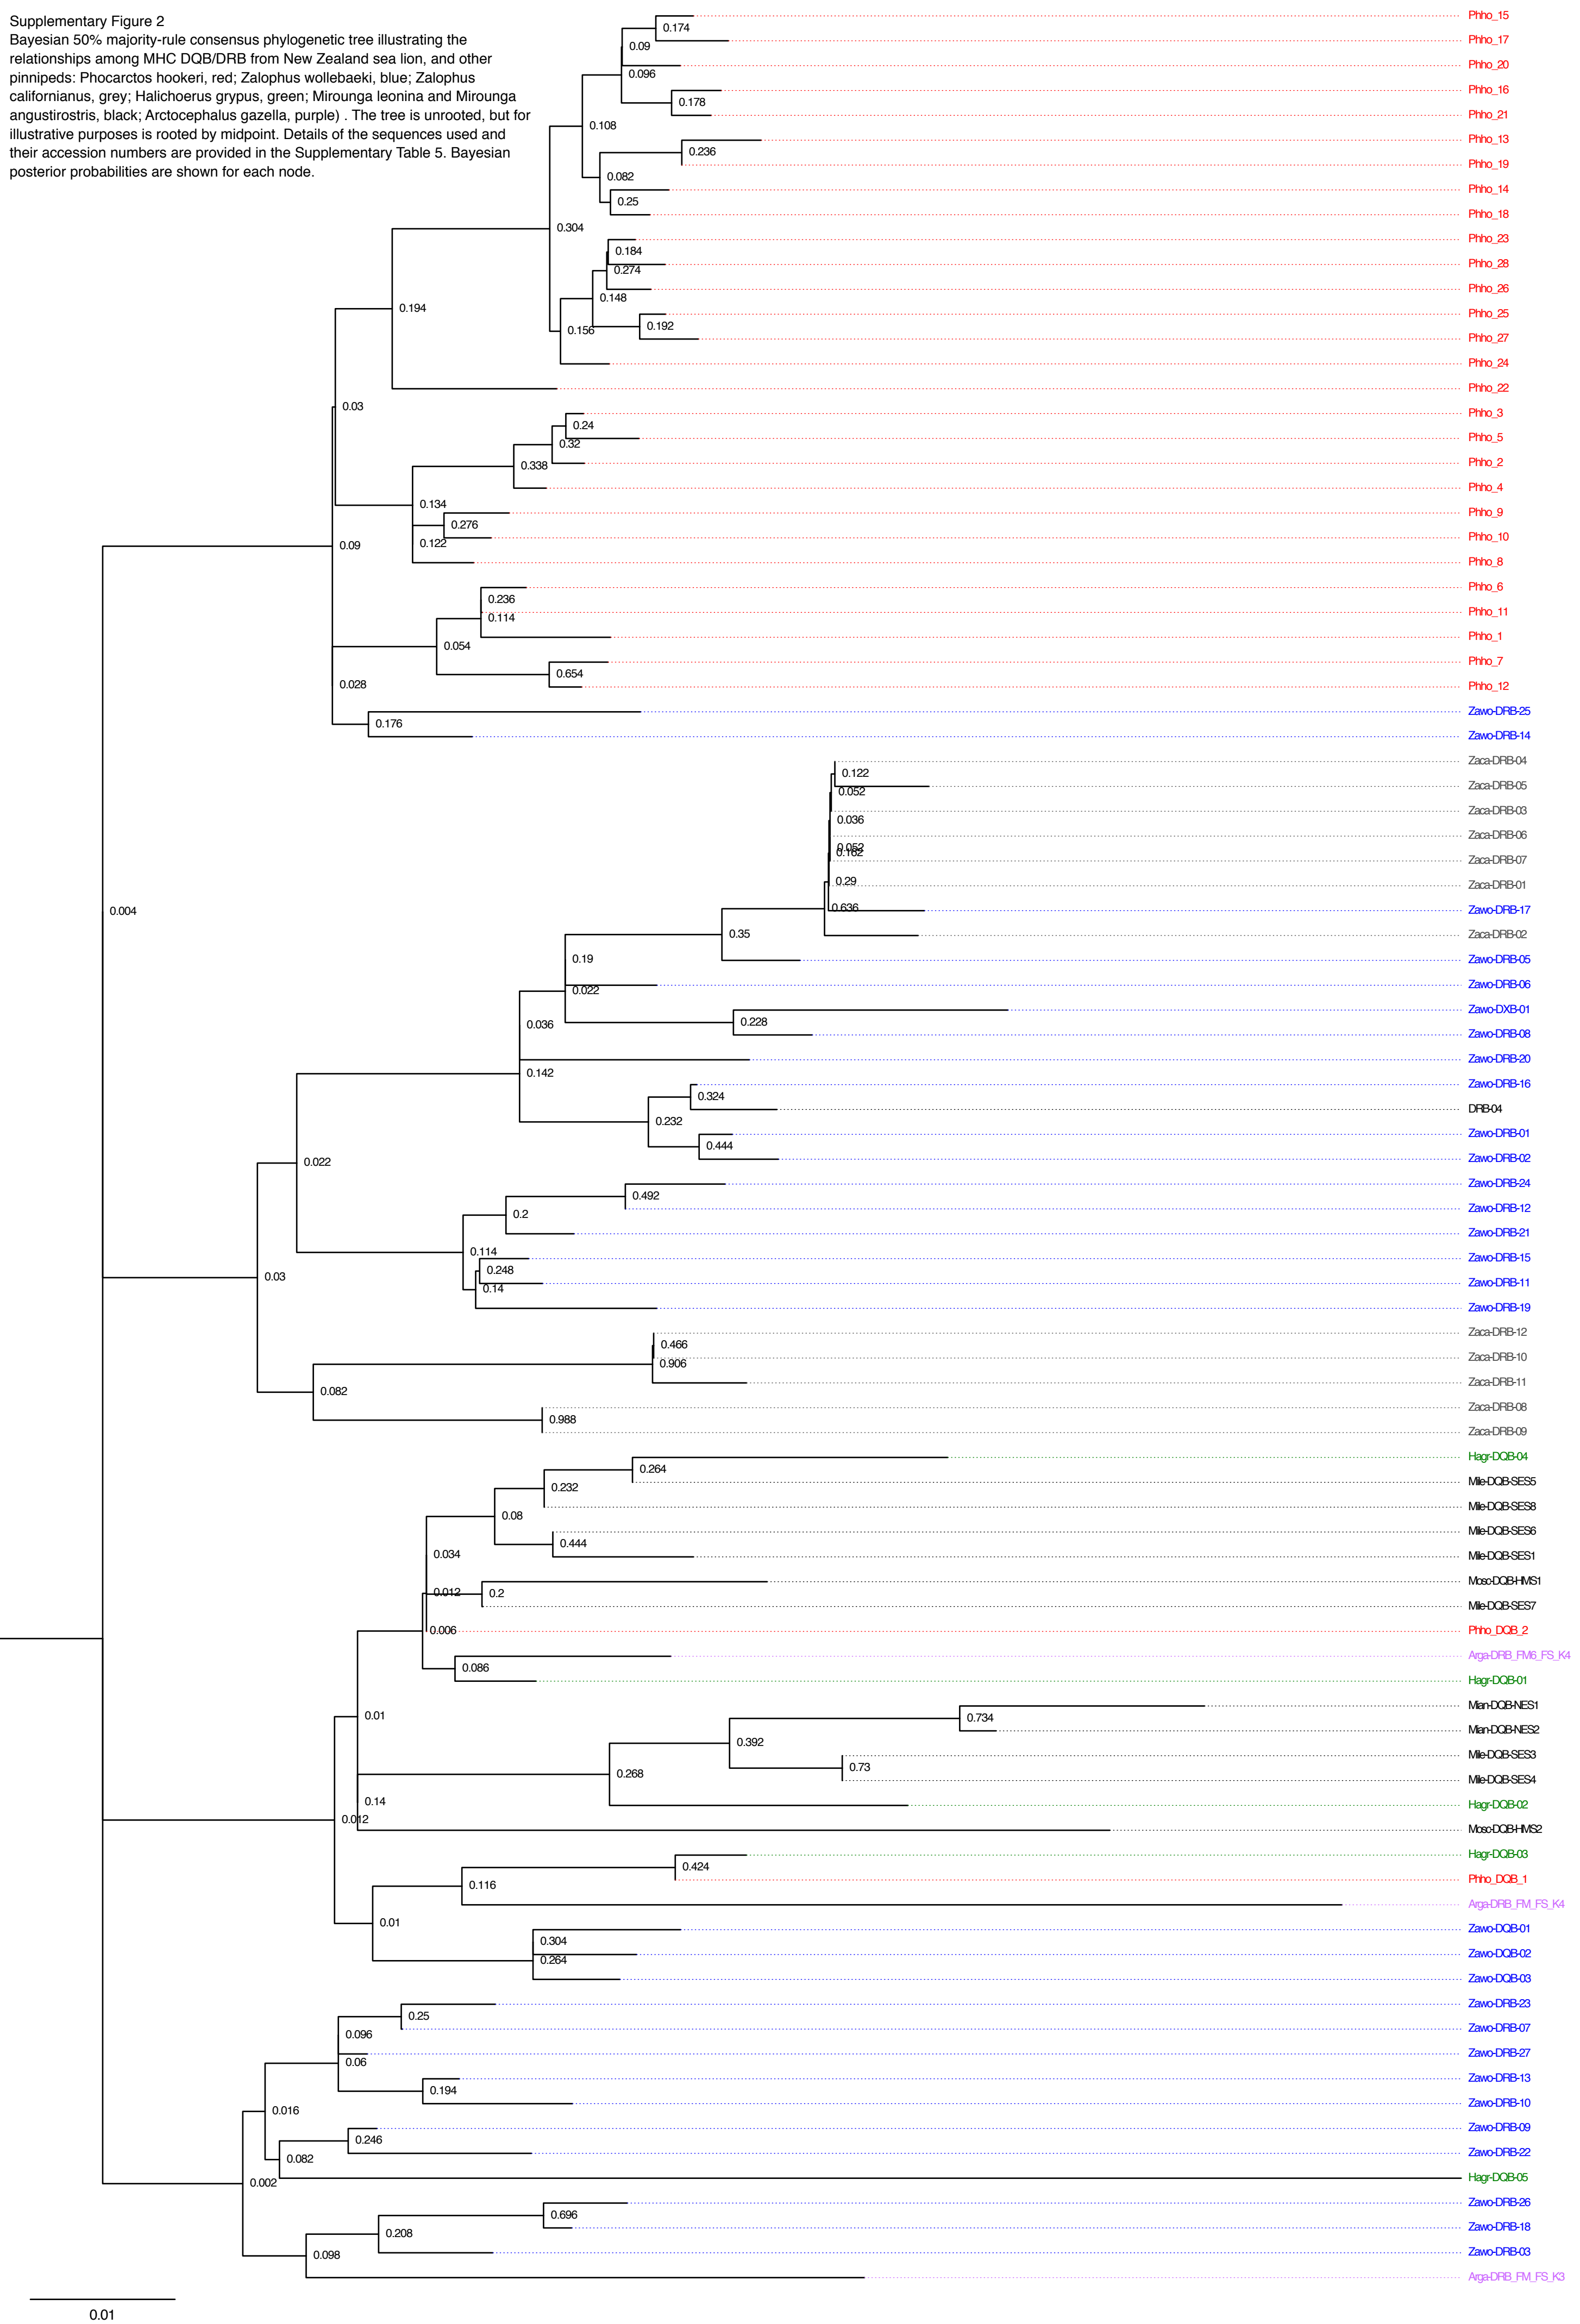

Supplement: hdy201318x2.pdf [file hdy201318x2.pdf]
